# Supplementary material for: How zinc ions shift and enhance the nucleotide's fluorescence spectra
Source: Royal Society of Chemistry journal article supplement (doi:10.1039/c7nj04630h), 2018-01-01
Supplement: c7nj04630h1.pdf [file c7nj04630h1.pdf]

Manuscript NJ-ART-11-2017-004630: »How zinc ions shift and enhance the nucleotide's fluorescence spectra«

by A. Omerzu and I. Turel

## Electronic Supplementary Information

### 1. Determination of the formation constant K for the Zn(II) – nucleotide complex

For the analysis of our experimental data we have adopted the method described in A. Munoz de la Pena et al., *J. Incl. Phenom.* **15**, 131 (1993) and V. K. Smith et al. *J. Incl. Phenom.* **10**, 471 (1991). For the reaction:

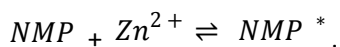

where NMP is a nucleotide and NMP\* is a fluorescent nucleotide – Zn complex, the formation constant K is given by

$$K = \frac{[NMP^*]}{([NMP] - [NMP^*]) \cdot ([Zn^{2+}] - [NMP^*])} \approx \frac{[NMP^*]}{([NMP] - [NMP^*]) \cdot [Zn^{2+}]}$$

since the fixed  $Zn^{2+}$  concentration (1mM) is much larger than the nucleotide's concentrations. Rearranging the formula, we obtain a ratio between the concentration of complexed nucleotides and the total concentration of nucleotides:

$$\frac{[NMP^*]}{[NMP]} = \frac{K[Zn^{2+}]}{1 + K[Zn^{2+}]} = \frac{1}{1 + 1/K[Zn^{2+}]}$$

This expression holds for all concentrations of nucleotides providing that  $[NMP] \ll [Zn^{2+}]$ . Now we can write the complex concentrations normalized to the first (the lowest) concentration, which equals the normalized fluorescence intensity, as a linear function of the normalized total nucleotide's concentrations:

$$\frac{[NMP^*]_N}{[NMP^*]_1} = \frac{I_N}{I_1} = \frac{1}{1 + 1/K[Zn^{2+}]} \frac{[NMP]_N}{[NMP]_1}.$$

By plotting  $I_N / I_1$  versus  $[NMP]_N / [NMP]_1$ , we can obtain the constant K from a linear fit.

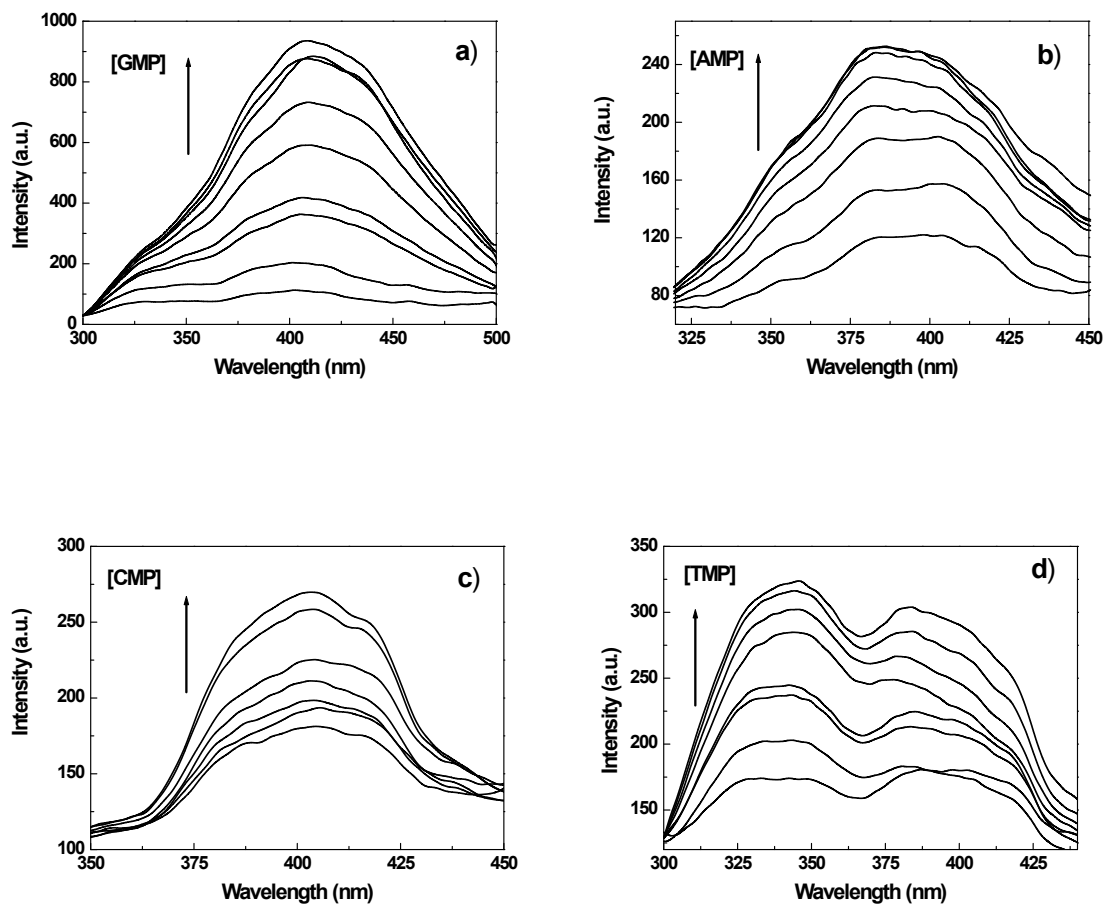

**Fig. S1** Fluorescence spectra of four nucleotide – Zn(II) complexes with increasing nucleotide's concentrations between  $1 \times 10^{-5}$  M and  $1 \times 10^{-4}$  M. The concentration of Zn ions was hold constant – 1 mM.

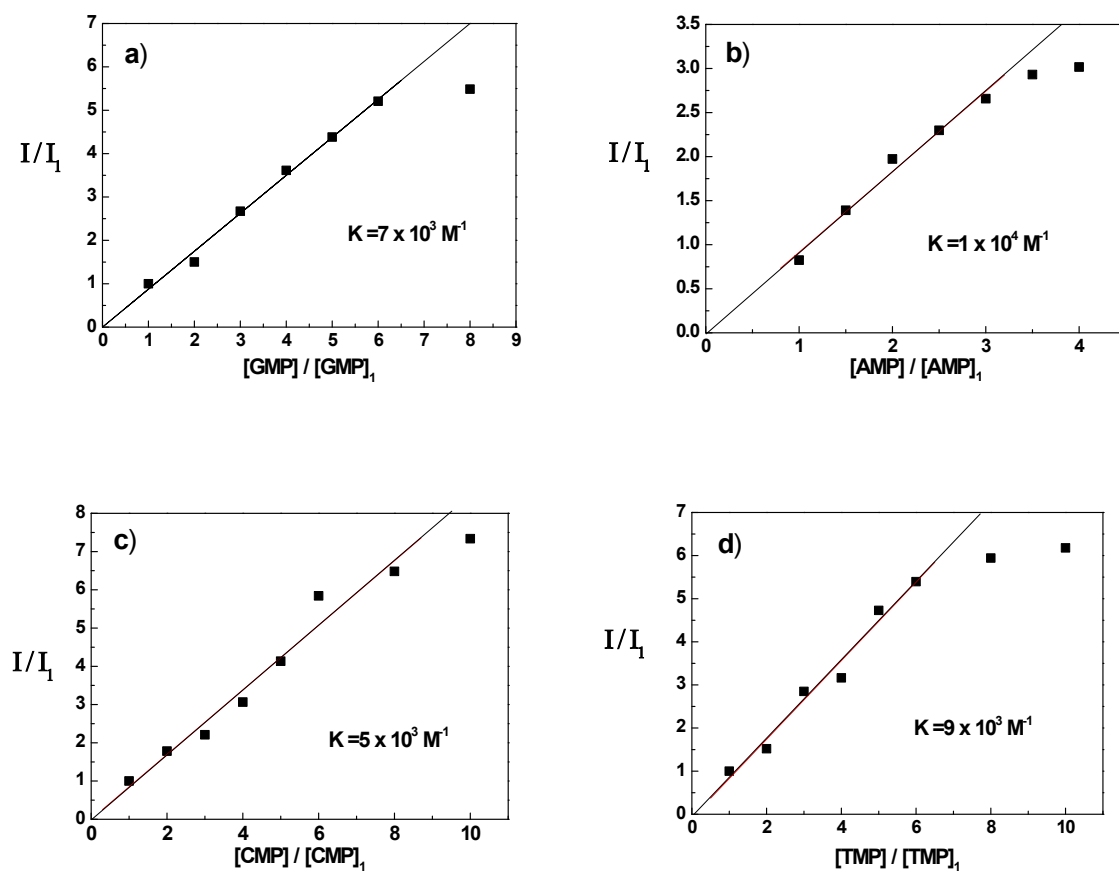

**Fig. S2** The normalized fluorescence intensities of four nucleotides – Zn(II) complexes as functions of the normalized total nucleotide's concentrations. The reaction constants  $K$  were calculated from the slopes of the linear fits.

## 2. Absorption Spectra

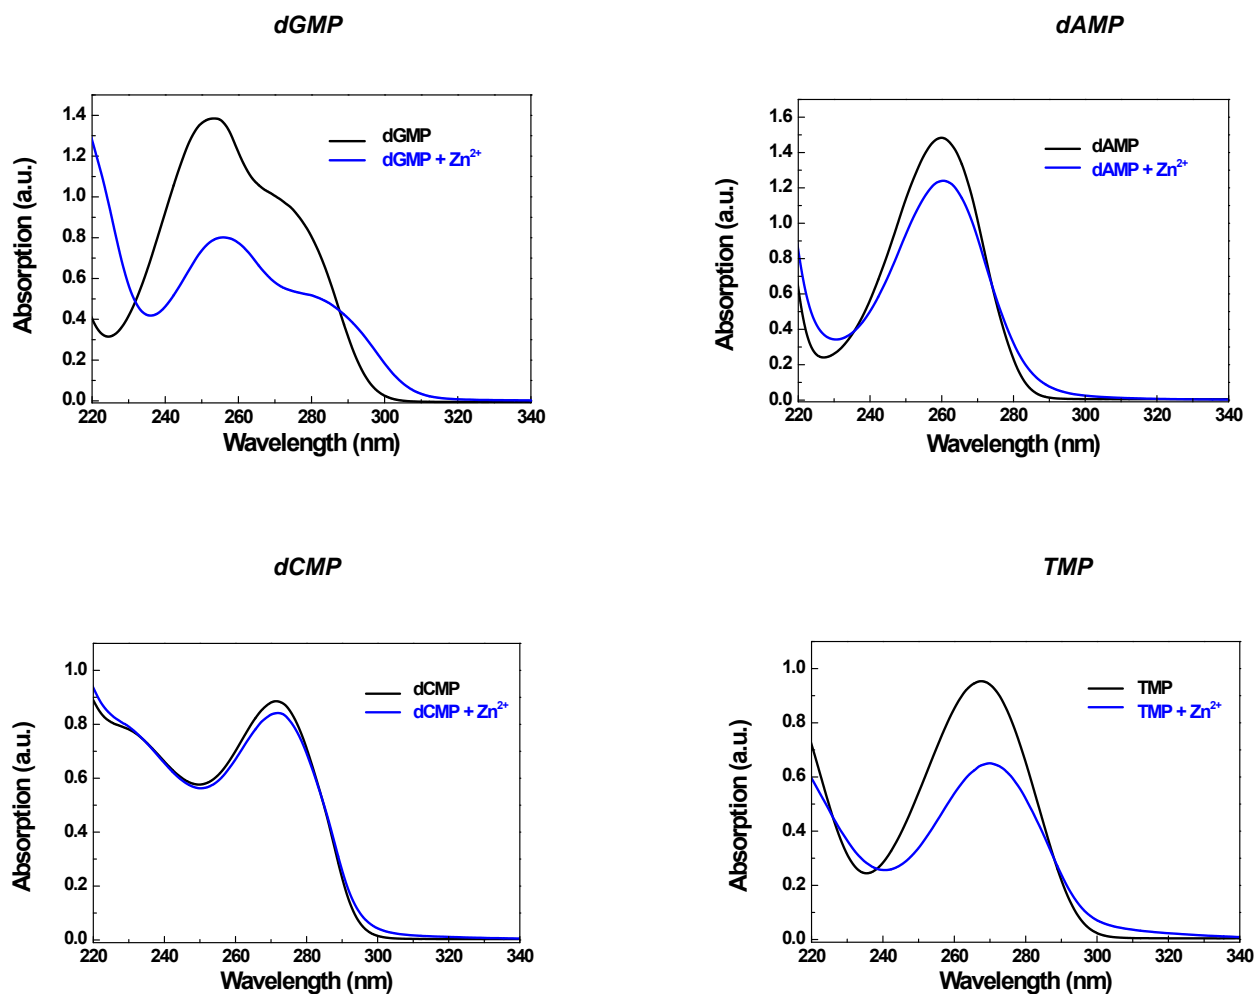

**Fig. S3** Absorption spectra of four DNA nucleotides in 10 mM Tris-HCl buffer pH 9 without (black curves) and with 1 mM ZnCl<sub>2</sub> added (blue curves). The spectra were recorded with HP 8453 UV-Vis spectrophotometer.

### 3. Excitation Spectra

#### *2'-deoxyguanosine 5'-monophosphate (dGMP)*

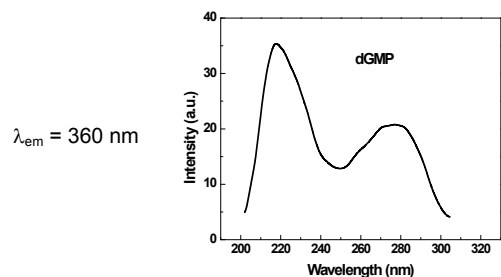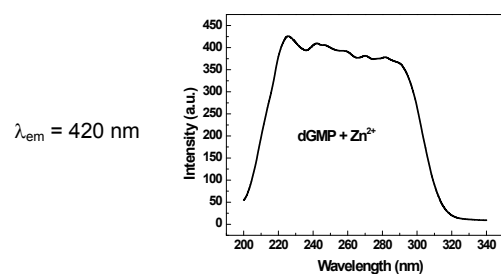

#### *2'-deoxyadenosine 5'-monophosphate (dAMP)*

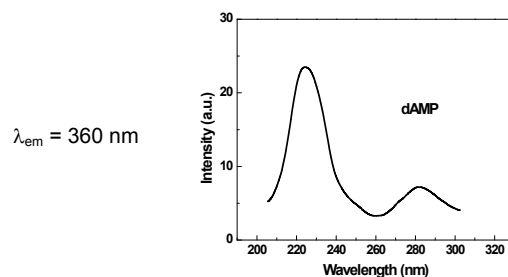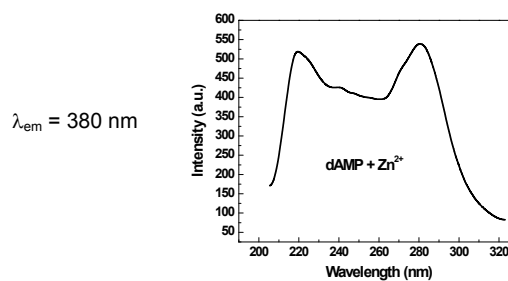

#### *2'-deoxycytidine 5'-monophosphate (dCMP)*

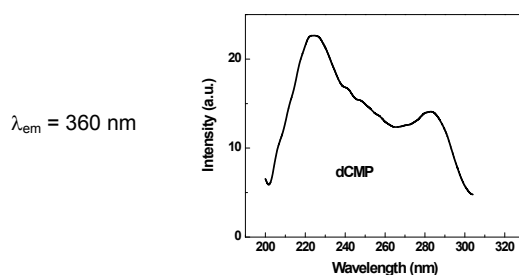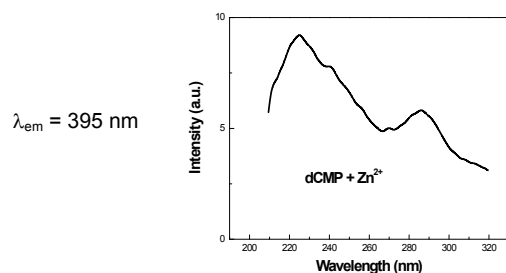

#### *Thymidine 5'-monophosphate (TMP)*

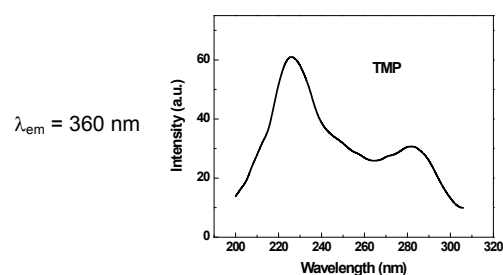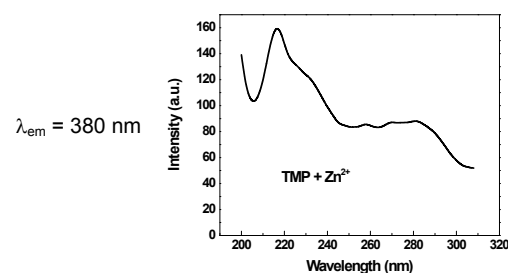

**Fig. S4** Excitation spectra of four DNA nucleotides in 10 mM Tris-HCl buffer, pH 9, without (upper frame) and with 1 mM  $\text{ZnCl}_2$  added (lower frame). The spectra were recorded with Perkin-Elmer LS 55 spectrofluorometer.

#### 4. Time-decay

Samples: Calf Thymus (CT) DNA, 2'-deoxyguanosine 5'-monophosphate (dGMP), 2'-deoxyadenosine 5'-monophosphate (dAMP) in 10 mM Tris-HCl buffer pH 9; 1 mM ZnCl<sub>2</sub>.

Measurements: Time Correlated Single Photon Counting (TCSPC) with Fluorolog 3 (Horiba Jobin Yvon) spectrofluorometer. Excitation wavelength  $\lambda_{\text{ex}} = 294$  nm; emission wavelength  $\lambda_{\text{em}} = 400$  nm (special thanks to dr. Miroslav Dramićanin, Vinča Institute of Nuclear Sciences, Serbia, for his assistance).

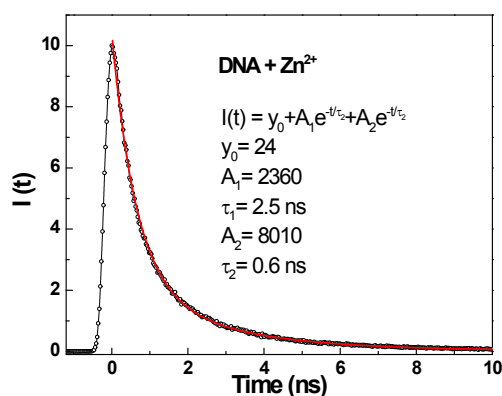

**Fig. S5** A fluorescence time-decay of Zn(II) - Calf-Thymus DNA complex. The decay is fitted with a double-exponential function.

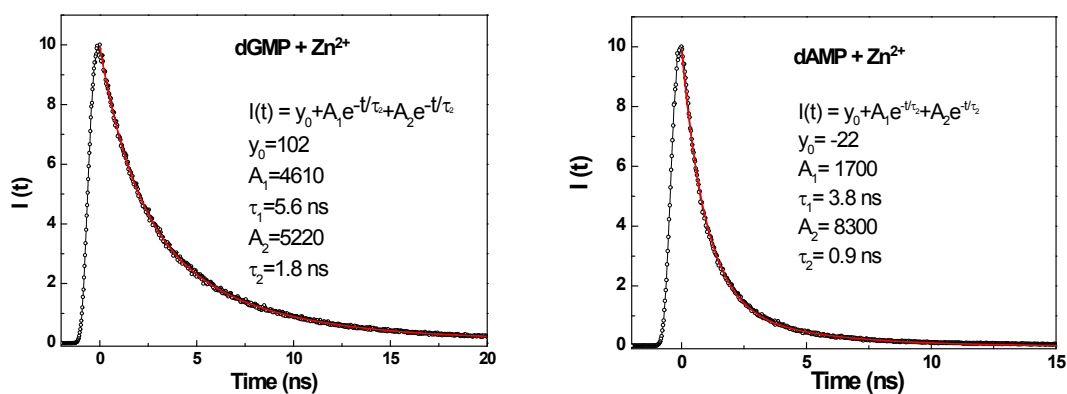

**Fig. S6** Fluorescence time-decay of Zn(II) – 2'-deoxyguanosine 5'-monophosphate (dGMP) (left) and Zn(II) – 2'-deoxyadenosine 5'-monophosphate (dAMP) (right) complexes.
